# Supplementary material for: Construction of a lysosome-targetable ratiometric fluorescent probe for H2O2tracing and imaging in living cells and an inflamed model
Source: Royal Society of Chemistry journal article supplement (doi:10.1039/d1ra04026j), 2021-01-01

## **Construction of a lysosome-targetable ratiometric fluorescent probe for H<sub>2</sub>O<sub>2</sub> tracing and imaging in living cells and inflamed model**

Rongrong Zhou<sup>b,f,#</sup>, Qiyao Peng<sup>a,#</sup>, Dan Wan<sup>b,#</sup>, Chao Yu<sup>a</sup>, Yuan Zhang<sup>a</sup>, Yi Hou<sup>a</sup>, Quan Luo<sup>d</sup>, Xiong Li<sup>e</sup>, Shuihan Zhang<sup>b</sup>, Lin Xie<sup>a,\*</sup>, Pinghua Ou<sup>c,\*</sup>, Yongbo Peng<sup>a,b,\*</sup>

<sup>#</sup>These authors contributed equally to this work.

\*Corresponding author: 992934546@qq.com (L. Xie); myhuahua07@163.com (P. Ou); pengyongbo2000@126.com (Y. Peng)

## **Materials and instruments**

All chemical reagents were obtained from commercial suppliers and used without further purification. In all experiments, double distilled water was obtained from a Millipore Milli-Q system (USA). LCQ advantage ion trap mass spectrometer (Thermo Finnigan) was used to record the mass spectra. All chemical reactions were uniform stirred by a magnetic stirrer and monitored by thin-layer chromatography (TLC). Flash column chromatography was carried out using silica gel (200-300 mesh). A Bruker DRX-400 spectrometer using TMS as an internal standard to give NMR spectra. A Hitachi U-4100 UV-vis spectrophotometer (Japan) with 1.0 cm path length quartz cuvette was used to collect UV-vis absorption spectra. A PHS-3C pH meter was used to measure pH values. All fluorescence measurements with a G9800A fluorescence spectrometer with both excitation and emission slits fixed at 2.5 nm, respectively. Fluorescence imaging experiment was conducted on a confocal laser scanning microscope (Olympus, Japan) with 405, and 553 nm excitation.

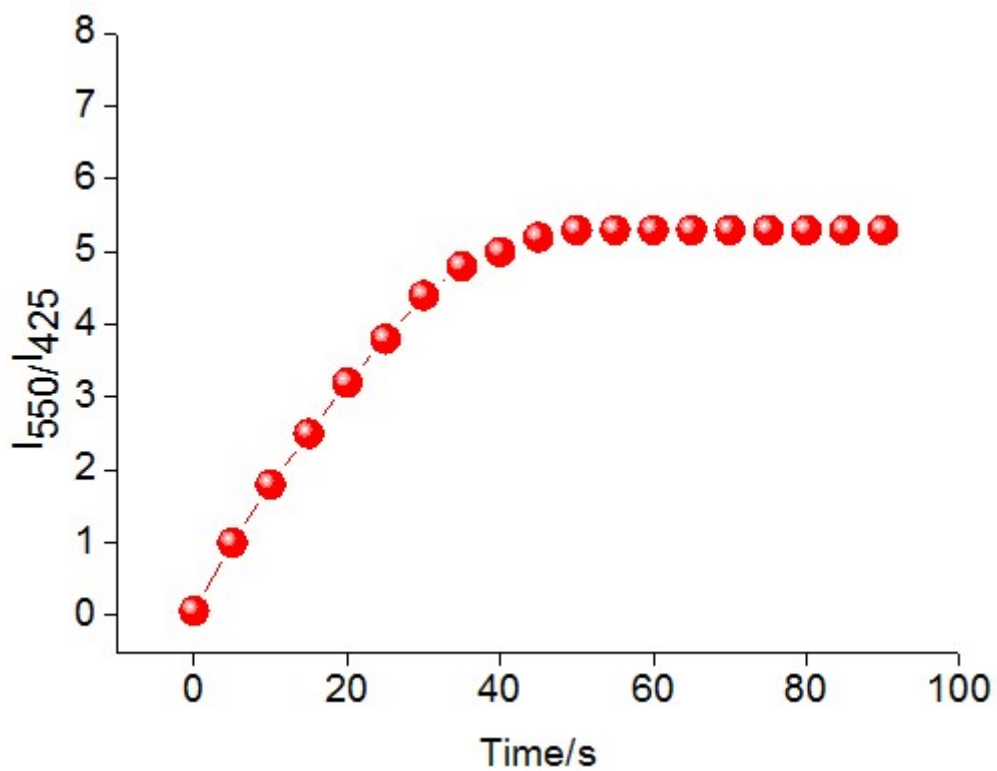

**Fig.S1.** Time-dependent fluorescence intensity ratios ( $I_{550}/I_{425}$ ) of **NPT-H<sub>2</sub>O<sub>2</sub>** upon addition of H<sub>2</sub>O<sub>2</sub> (60.0  $\mu$ M).

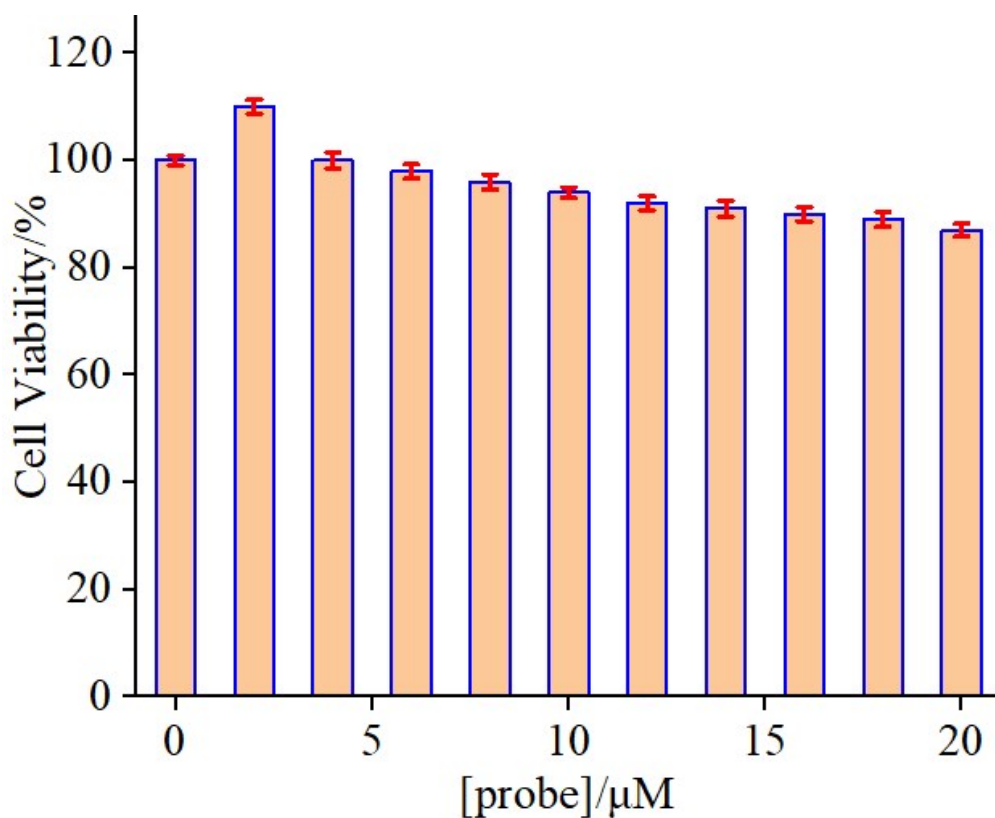

**Fig. S2.** Viability of HeLa cells treated with various concentrations (0-20.0)  $\mu\text{M}$  of NPT- $\text{H}_2\text{O}_2$  for 24 h. Error bars represent mean values  $\pm$  SD. (n= 3)

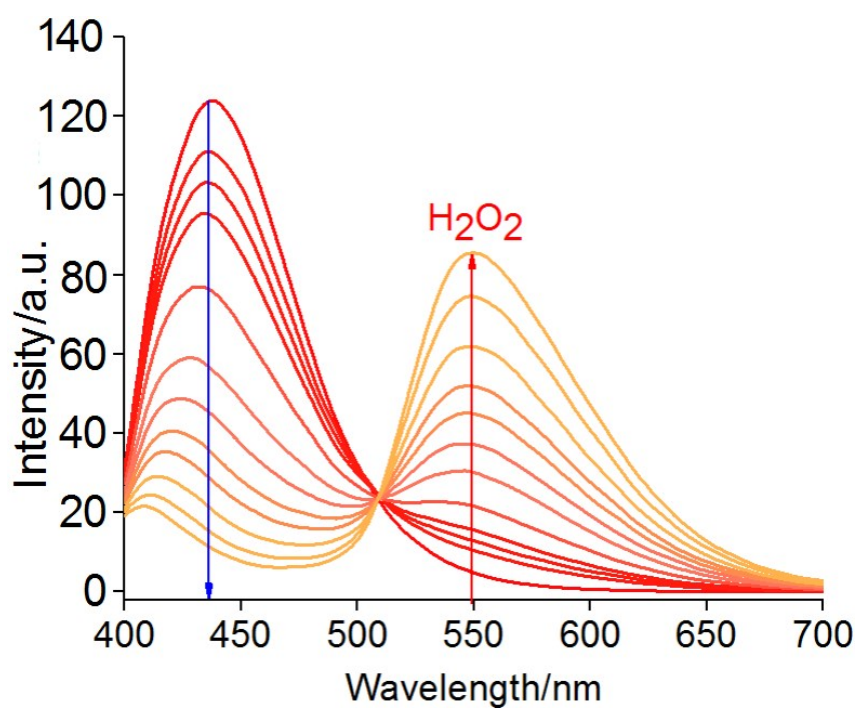

**Fig.S3.** Fluorescence spectra of 5.0  $\mu\text{M}$  NPT- $\text{H}_2\text{O}_2$  after adding different amount of  $\text{H}_2\text{O}_2$  (0-60.0)  $\mu\text{M}$  in 10 mM PBS solution (pH 7.4),  $\lambda_{\text{ex}}=375$  nm.

**Table S1.** The details of fluorescent quantum yields

| pH 5.0 + 0 $\mu\text{M}$ $\text{H}_2\text{O}_2$ |                | pH 5.0+60 $\mu\text{M}$ $\text{H}_2\text{O}_2$ |               |
|-------------------------------------------------|----------------|------------------------------------------------|---------------|
| 0.51 (425 nm)                                   | 0.032 (550 nm) | 0.051 (425 nm)                                 | 0.23 (550 nm) |

The quantum yields of **NPT- $\text{H}_2\text{O}_2$**  was calculated by comparison with rhodamine 6G ( $R=0.95$  in ethanol) as a reference using the following equation:  $\Phi_F=IA_R(n/n_R)^2\Phi_{FR}/I_RA$ . Where F is the quantum yield, I is the integrated area under the fluorescence spectra, A is the absorbance, n is the refractive index of the solvent, and R refers to the reference rhodamine 6G.

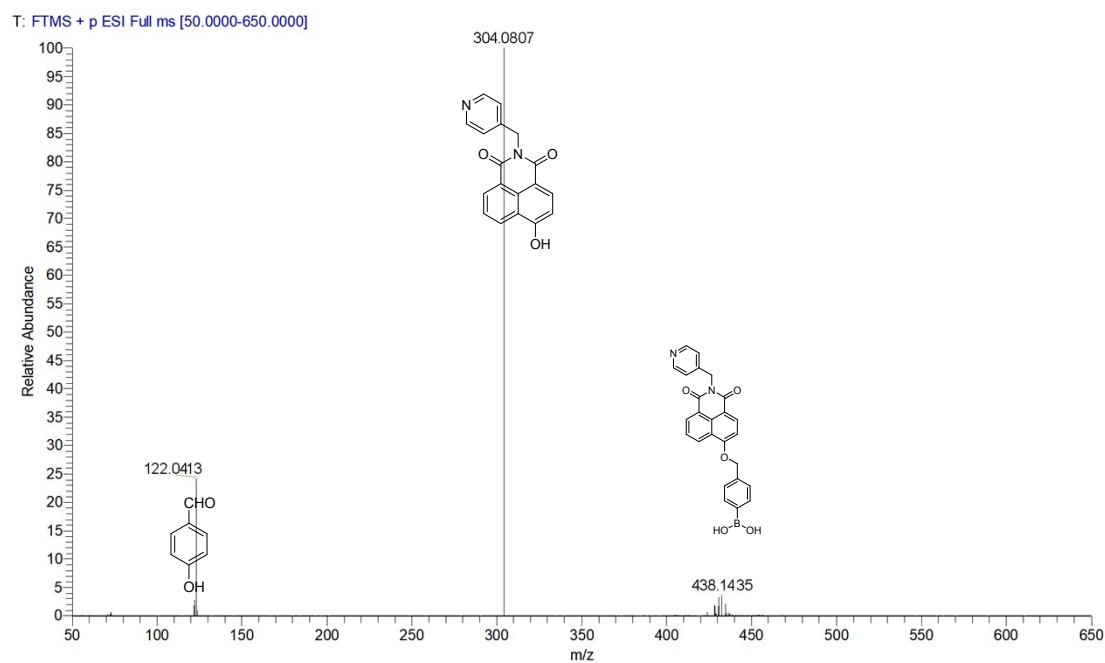

**Fig. S4.** The response mechanism of 5.0  $\mu\text{M}$  **NPT- $\text{H}_2\text{O}_2$**  and 60.0  $\mu\text{M}$  hydrogen peroxide in 10 mM PBS.

# <sup>1</sup>HNMR, <sup>13</sup>CNMR and MS

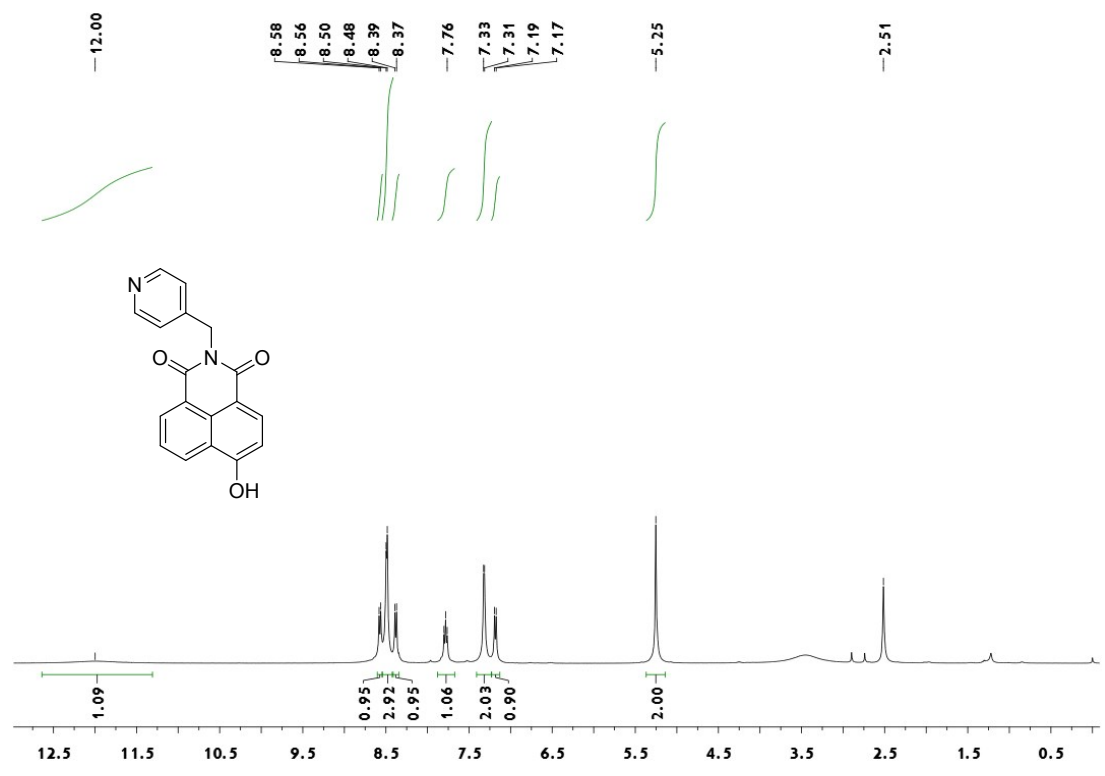

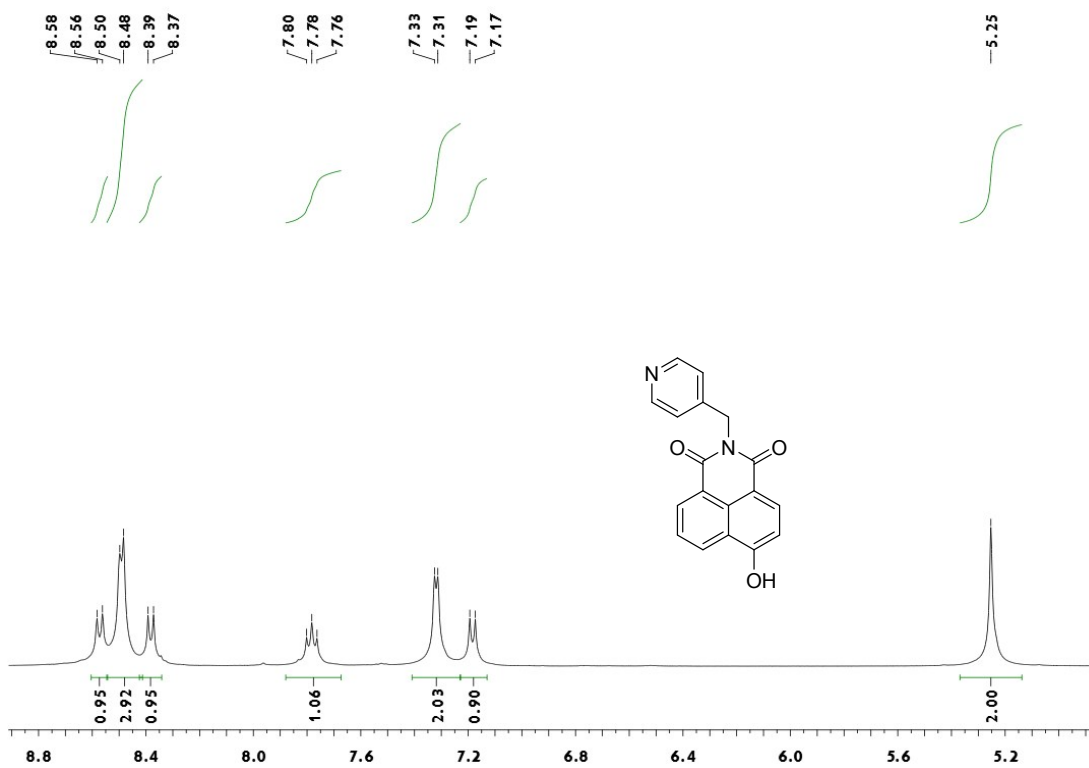

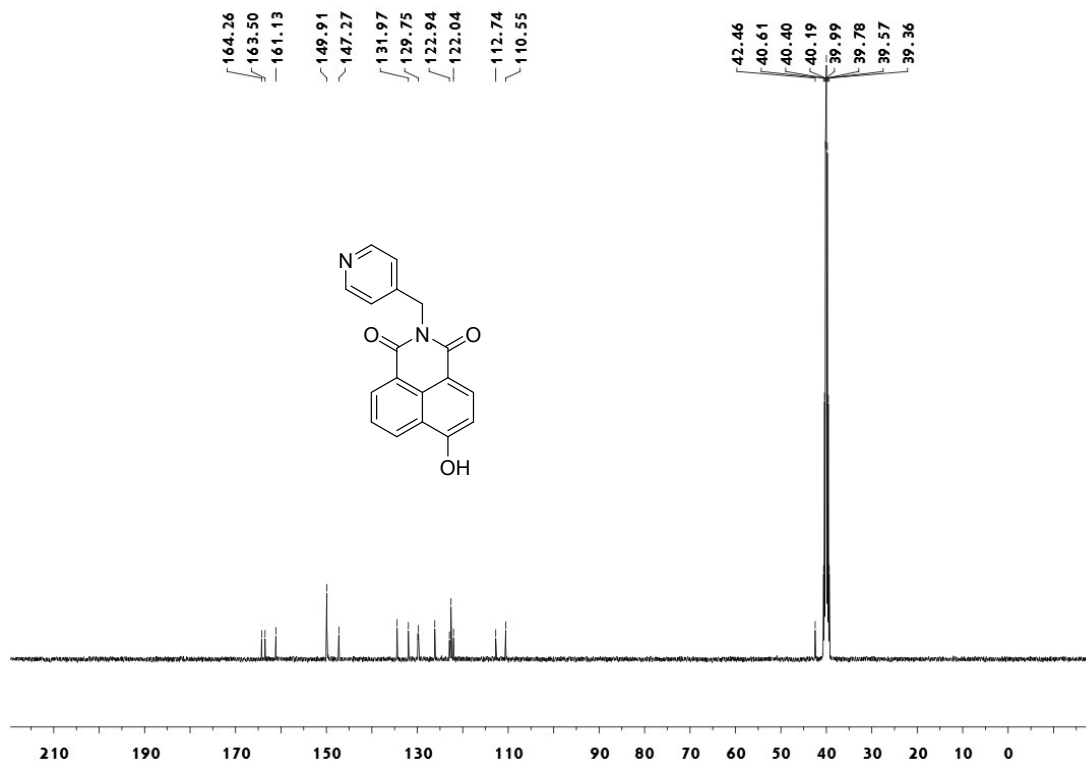

T: FTMS + p ESI Full ms [150.0000-600.0000]

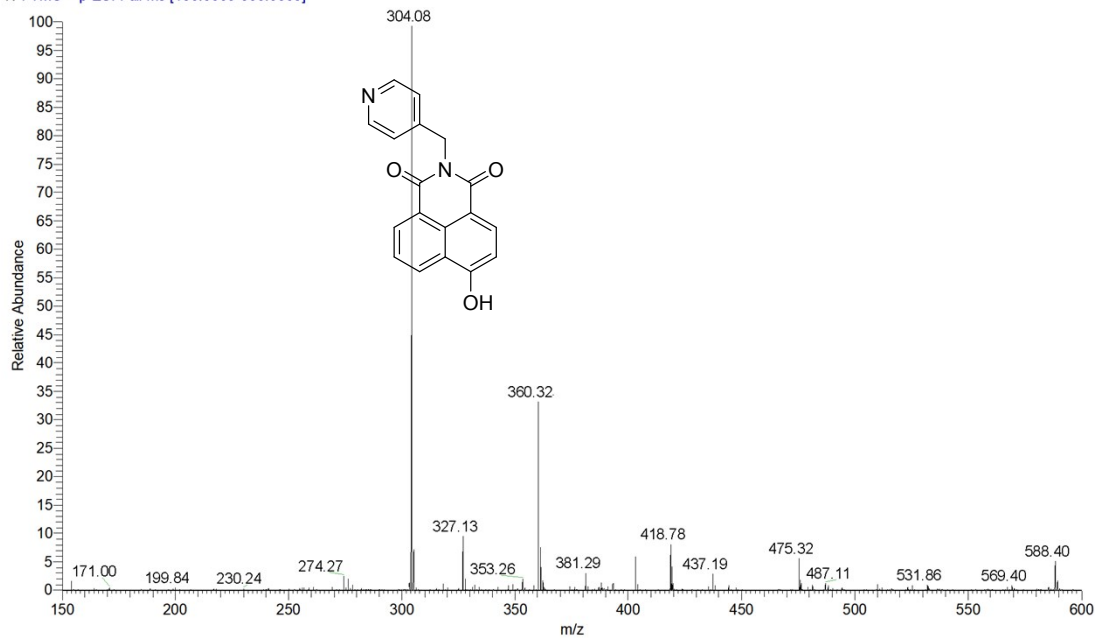



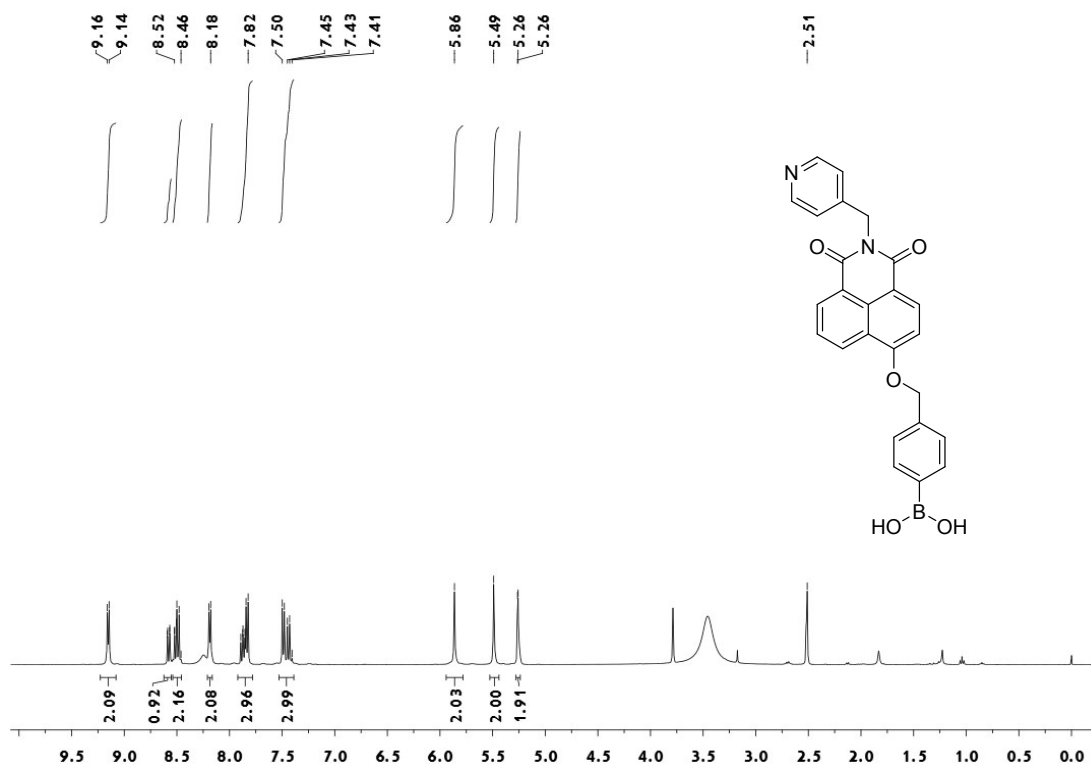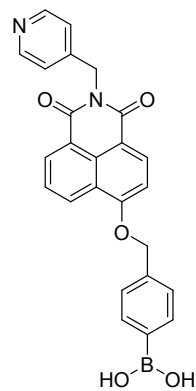

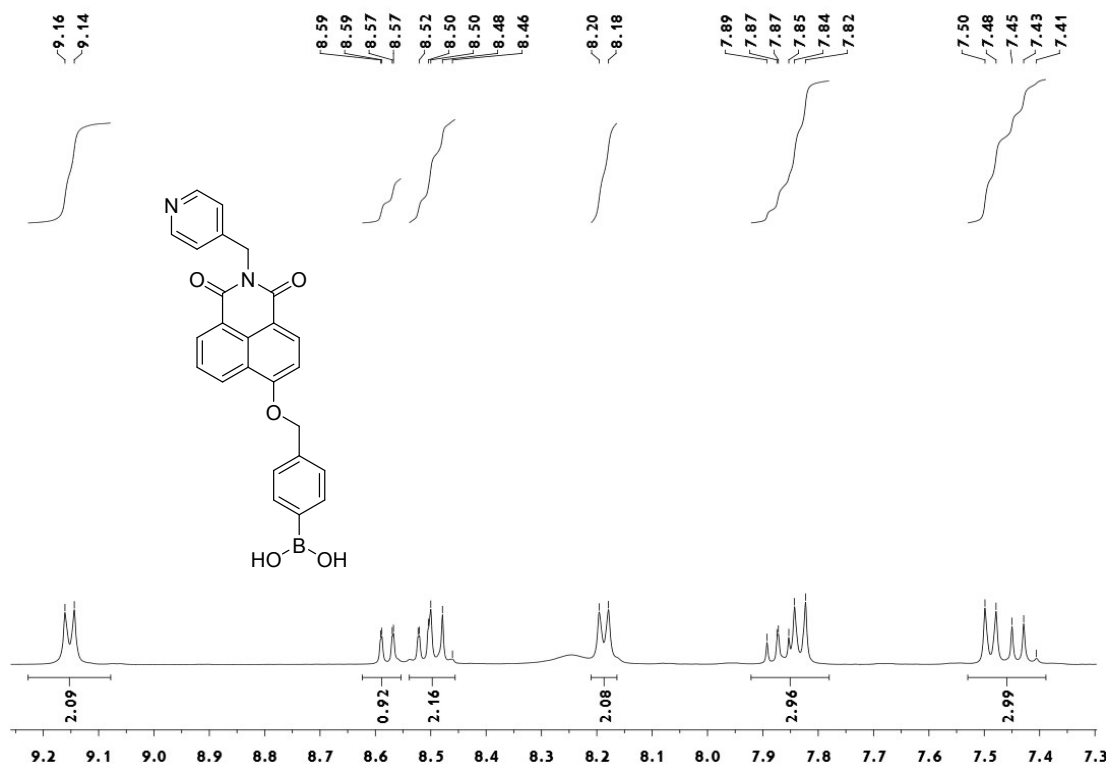

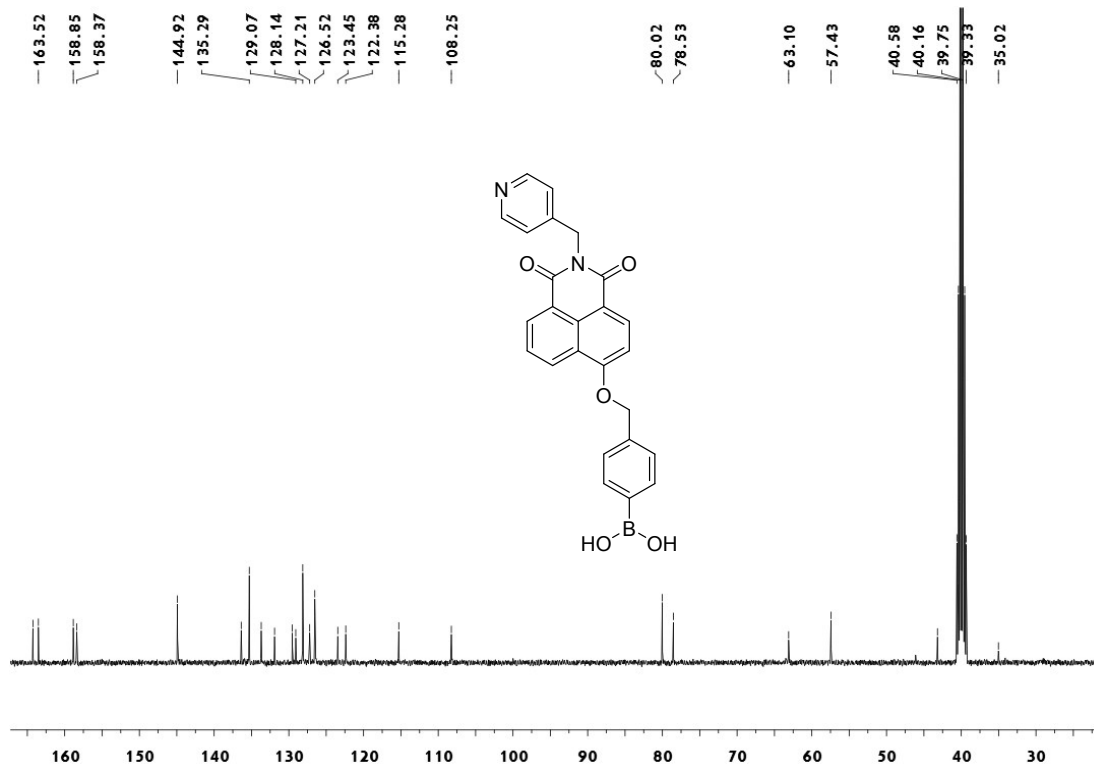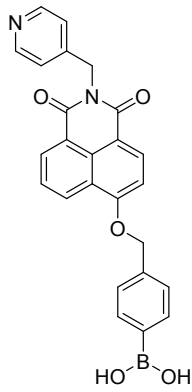

T: FTMS + p ESI Full ms [150.0000-600.0000]

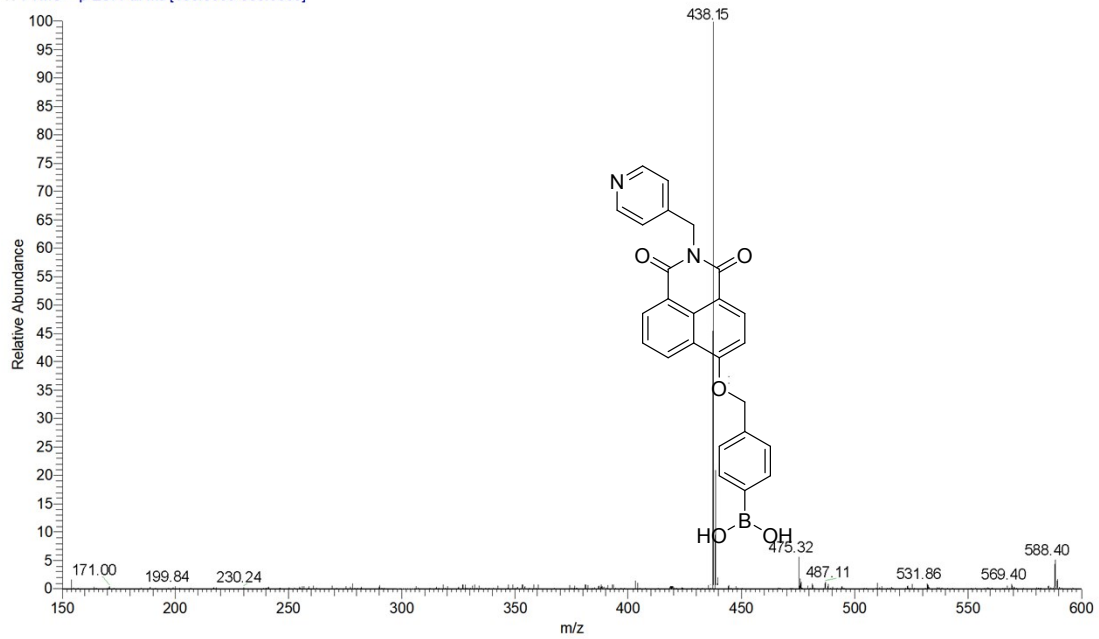

Supplement: d1ra04026j1.pdf [file d1ra04026j1.pdf]
